# Supplementary material for: Omicron BA.2 breakthrough infection enhances cross-neutralization of BA.2.12.1 and BA.4/BA.5
Source: PubMed Central journal article supplement (PMC9529054; doi:10.1126/sciimmunol.ade2283), 2022-09-20
Supplement: sciimmunol.ade2283_sm.pdf [file sciimmunol.ade2283_sm.pdf]

Supplementary Materials for  
**Omicron BA.2 breakthrough infection enhances cross-neutralization of  
BA.2.12.1 and BA.4/BA.5**

Alexander Muik *et al.*

Corresponding author: Ugur Sahin, [ugur.sahin@biontech.de](mailto:ugur.sahin@biontech.de)

*Sci. Immunol.* , eade2283 (2022)  
DOI: 10.1126/sciimmunol.ade2283

**The PDF file includes:**

Figs. S1 to S6  
Tables S1 to S11

**Other Supplementary Material for this manuscript includes the following:**

MDAR Reproducibility Checklist



fig. S2

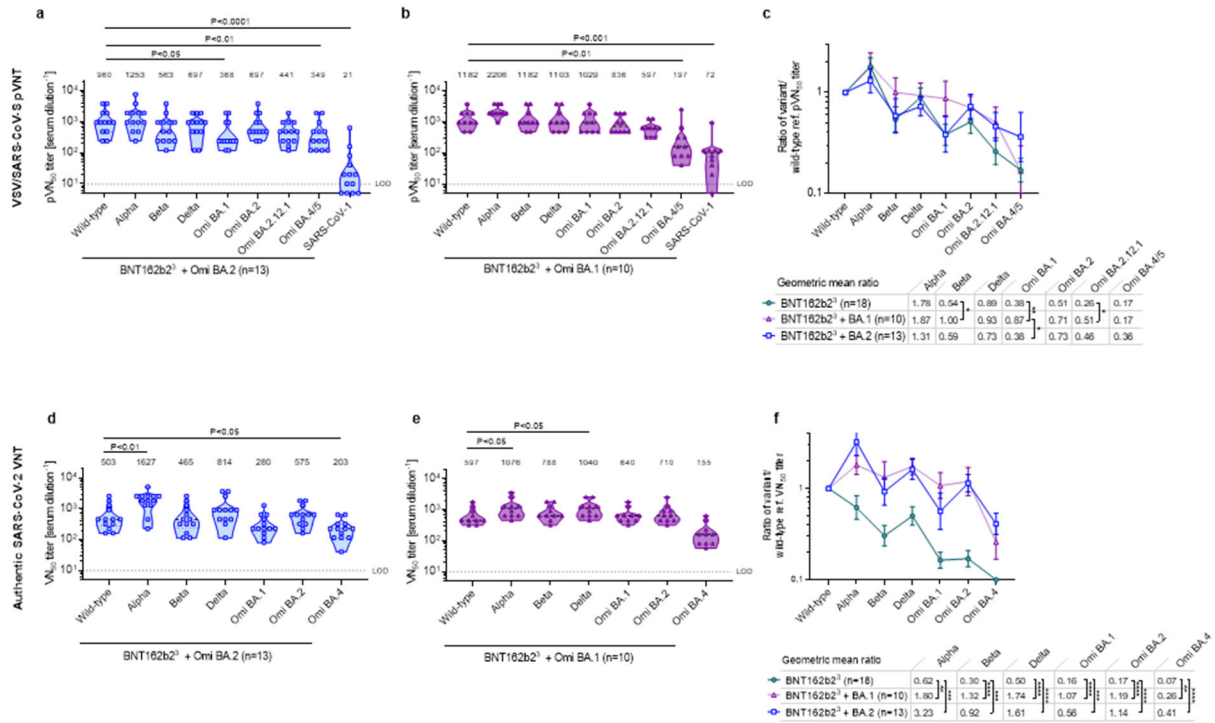

**Fig. S2. Omicron BA.2 breakthrough infection of BNT162b2 triple-vaccinated individuals induces broad neutralization of VOCs including Omicron BA.4/BA.5.**

Cohorts and serum sampling as described in Fig. 1. (a-b) 50% pseudovirus neutralization (pVN<sub>50</sub>) geometric mean titers (GMTs) against the indicated SARS-CoV-2 variants of concern (VOCs) or SARS-CoV-1 pseudoviruses. Values above violin plots represent group GMTs. (c) The ratio of SARS-CoV-2 VOC pVN<sub>50</sub> GMTs normalized against the wild-type strain pVN<sub>50</sub> GMT. Geometric mean ratios for the Omicron BA.2 breakthrough infected cohort were compared to data previously published in Quandt et al. (10) for BNT162b<sup>2</sup> and BNT162b<sup>2</sup> + BA.1, except for newly generated BA.2.12.1 neutralization data. Group geometric mean ratios with 95% confidence intervals are shown. (d-e) 50% virus neutralization (VN<sub>50</sub>) GMTs for BNT162b<sup>2</sup> + BA.1 and BNT162b<sup>2</sup> + BA.2. Values above violin plots represent group GMTs.

(f) The ratio of SARS-CoV-2 VOC GMTs normalized against the wild-type strain VN<sub>50</sub> GMT. Serum was tested in duplicate. For titer values below the limit of detection (LOD), LOD/2 values are plotted. The non-parametric Friedman test with Dunn's multiple comparisons correction was used to compare the group GMT against the wild-type strain with group GMTs against the indicated variants and SARS-CoV-1 (a-b and d-e). Multiplicity-adjusted p values are shown. The non-parametric Kruskal-Wallis test with Dunn's multiple comparisons correction was used to compare the VOC GMT ratios between cohorts (c and f). \*\*\*\*, P<0.0001; \*\*\*, P<0.001; \*\*, P<0.01; \*, P<0.05.

fig. S3

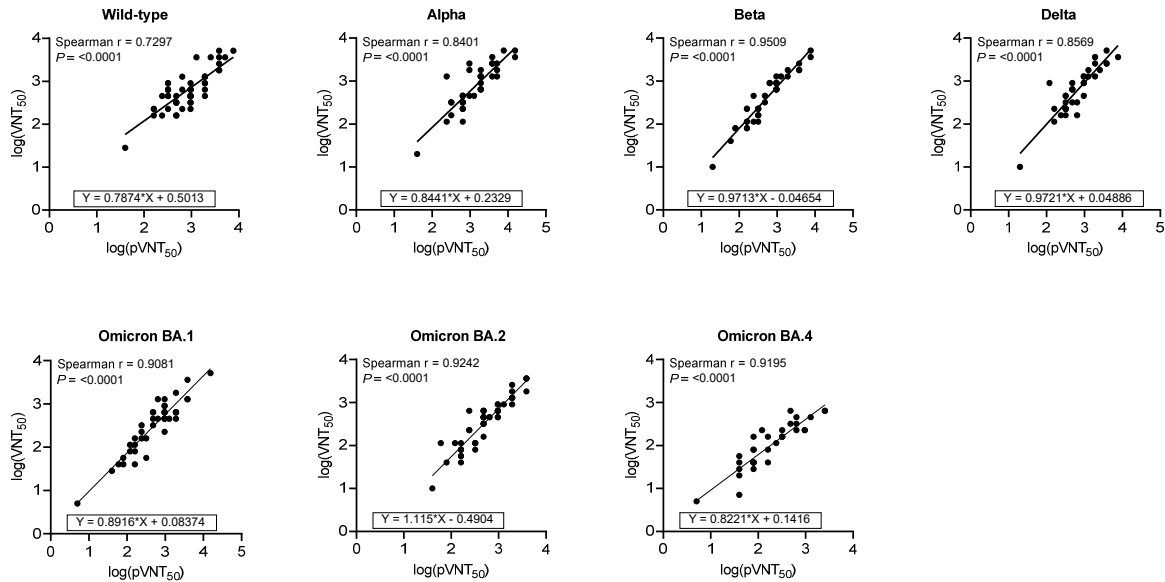

**Fig. S3. 50% pseudovirus neutralization (pVN<sub>50</sub>) correlates with 50% live SARS-CoV-2 neutralization (VN<sub>50</sub>) titer data**

Nonparametric Spearman correlation of VSV-SARS-CoV-2 pVN<sub>50</sub> with live SARS-CoV-2 VN<sub>50</sub> titers for n=51 serum samples drawn from SARS-CoV-2-naïve BNT162b2 triple-vaccinated individuals (BNT162b2<sup>3</sup>; n=18) after the third dose, from triple mRNA vaccinated individuals with subsequent Omicron BA.1 breakthrough infection (mRNA-Vax<sup>3</sup> + BA.1; n=14) post-infection, and from triple mRNA vaccinated individuals with subsequent Omicron BA.2 breakthrough infection (mRNA-Vax<sup>3</sup> + BA.2; n=19) post-infection. Correlations are plotted per SARS-CoV-2 variant. Correlation coefficient r, two-tailed P values and the linear equation are given.

fig. S4

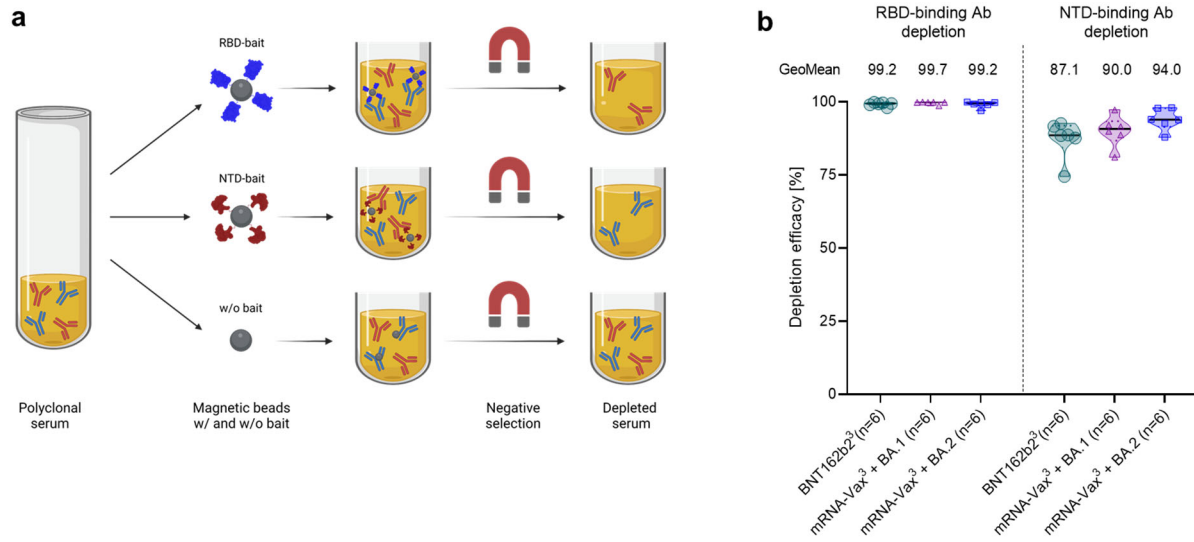

**Fig. S4. RBD-binding and NTD-binding antibodies can be depleted from human serum**

Serum was drawn from SARS-CoV-2-naïve BNT162b2 triple-vaccinated individuals

(BNT162b23; n=6), and from triple mRNA vaccinated individuals with Omicron BA.1 (mRNA-

Vax3 + BA.1; n=6) or Omicron BA.2 breakthrough infection (mRNA-Vax3 + BA.2; n=6).

Magnetic bead technology was used for depleting serum of RBD- or NTD-binding antibodies, or

for mock depleting. (a) Schematic of antibody depletion from serum. (b) The relative

concentration of RBD-binding and NTD-binding antibodies was determined by a multiplexed

electrochemiluminescence immunoassay. The relative decrease in antibody concentrations in

depleted compared to mock-depleted sera are shown. Numbers above graph depict geometric

mean reduction within groups.

**Fig. S5**

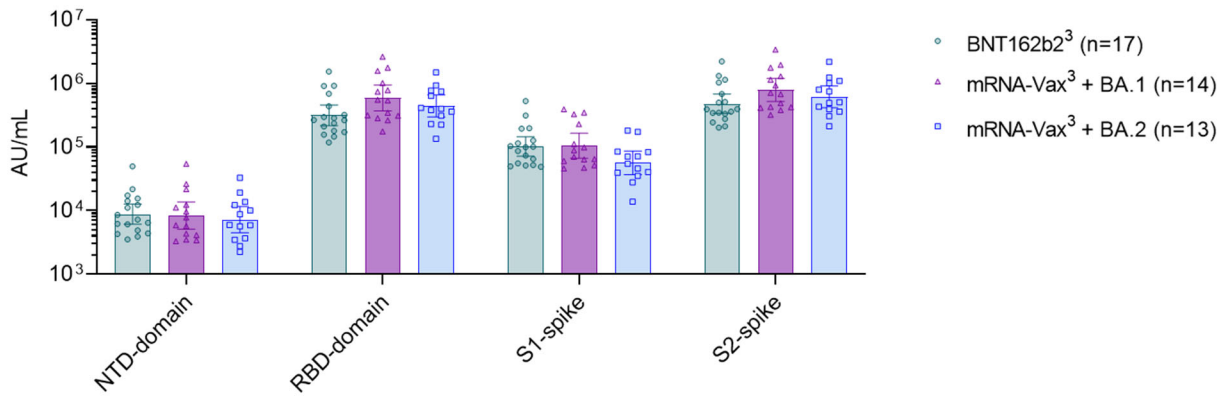

**Fig. S5. Serum antibody levels targeting S glycoprotein domains are not significantly different between cohorts.**

Cohorts and serum sampling as described in Fig. 1. Serum antibody levels targeting the NTD, RBD, S1 or S2 domains of the S glycoprotein were determined by electrochemiluminescence immunoassays. The non-parametric Kruskal-Wallis test with Dunn's multiple comparisons correction was used to compare concentrations of antibodies targeting each domain across cohorts. None of the comparisons reached statistical significance. AU, arbitrary units.

Fig. S6

a

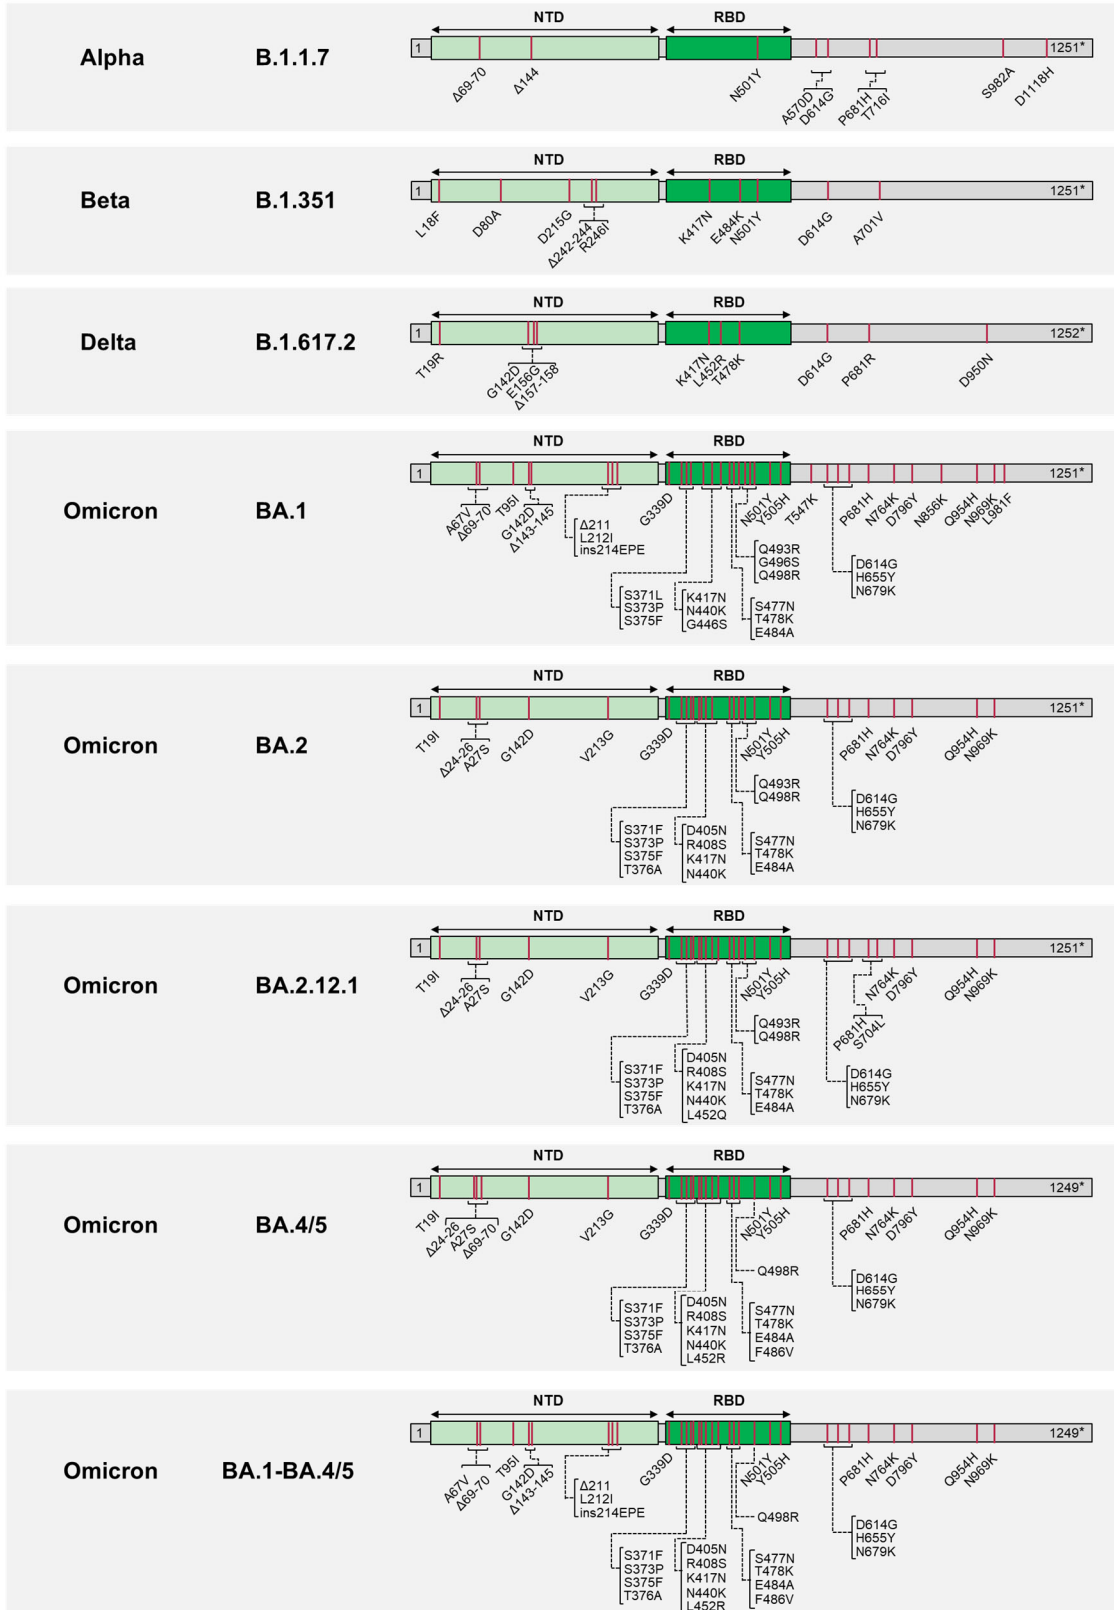



**b**

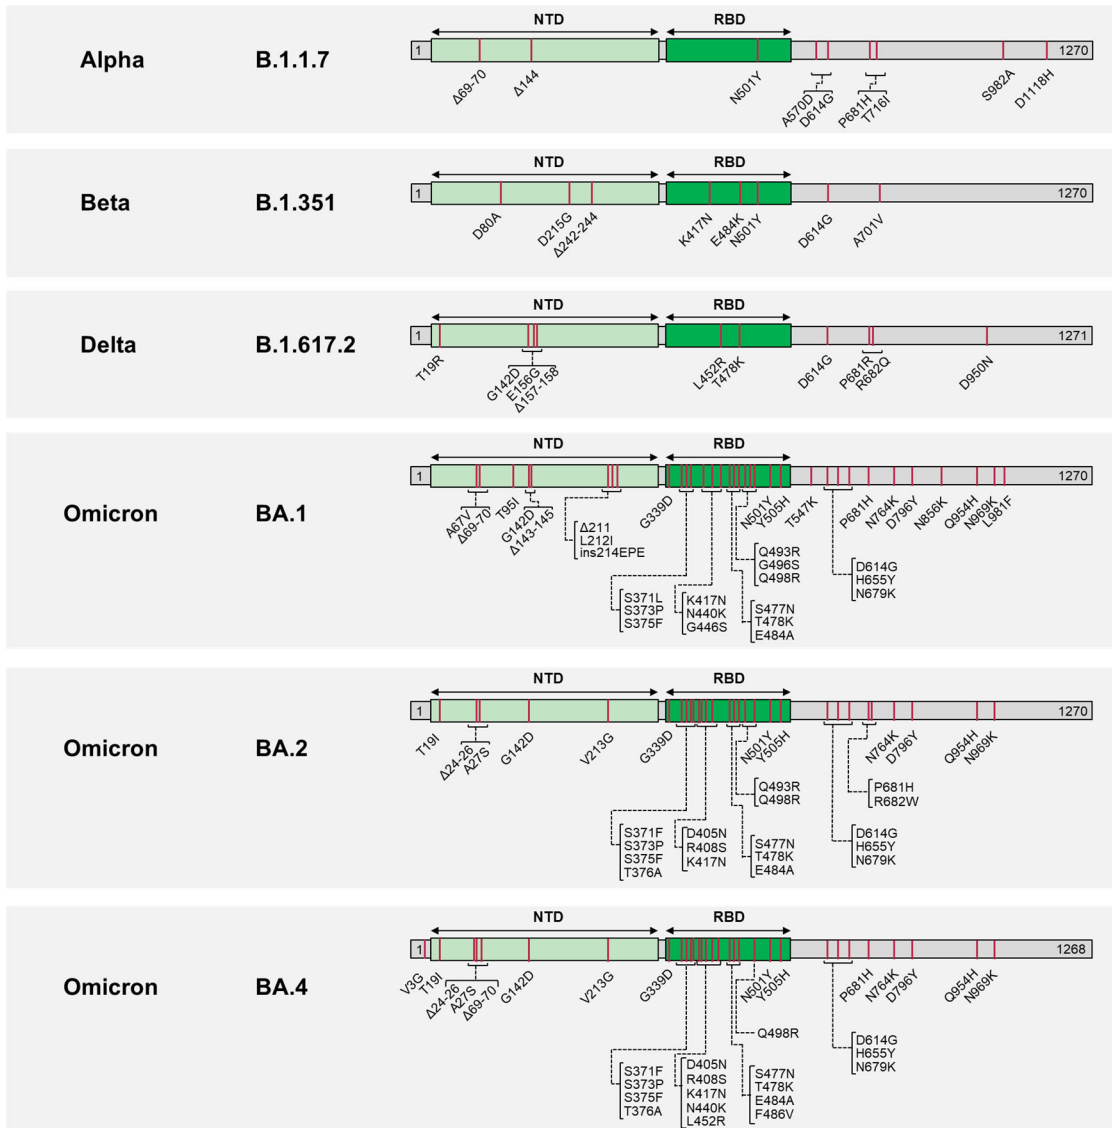

**Fig. S6. Characterization of SARS-CoV-2 S glycoproteins used in the assays based on (a) VSV-SARS-CoV-2 variant pseudoviruses and (b) live authentic SARS-CoV-2.**

The sequence of the Wuhan-Hu-1 isolate SARS-CoV-2 S glycoprotein (GenBank: QHD43416.1) was used as reference. Amino acid positions, amino acid descriptions (one letter code) and kind of alterations (substitutions, deletions, insertions) are indicated. NTD, N-terminal domain; RBD, Receptor-binding domain, Δ, deletion; ins, insertion; \*, Cytoplasmic domain truncated for the C-terminal 19 amino acids.

**Table S1. Vaccinated individuals analyzed for neutralizing antibody responses.**

| <b>Characteristic</b>                 | <b>BNT162b2<sup>3</sup><br/>(n=18)</b> | <b>mRNA-Vax<sup>3</sup><br/>+ BA.1<br/>(n=14)</b> | <b>mRNA-Vax<sup>3</sup><br/>+ BA.2<br/>(n=19)</b> |
|---------------------------------------|----------------------------------------|---------------------------------------------------|---------------------------------------------------|
| Sex, n (%)                            |                                        |                                                   |                                                   |
| Male                                  | 9 (50)                                 | 11 (79)                                           | 7 (37)                                            |
| Female                                | 9 (50)                                 | 3 (21)                                            | 12 (63)                                           |
| Age, median (range)                   | 38 (23-54)                             | 32 (23-60)                                        | 30 (25-74)                                        |
| Age group at vaccination, n (%)       |                                        |                                                   |                                                   |
| 18-55 yrs                             | 18 (100)                               | 12 (86)                                           | 15 (79)                                           |
| 56-85 yrs                             | 0 (0)                                  | 2 (14)                                            | 4 (21)                                            |
| SARS-CoV-2 status, n (%)              |                                        |                                                   |                                                   |
| Positive                              | 0 (0)                                  | 14 (100) <sup>#</sup>                             | 19 (100) <sup>*</sup>                             |
| Negative                              | 18 (100) <sup>†</sup>                  | 0 (0)                                             | 0 (0)                                             |
| Unknown                               | 0 (0)                                  | 0 (0)                                             | 0 (0)                                             |
| Interval, median (range)              |                                        |                                                   |                                                   |
| Days between D1/D2                    | ‡                                      | 38 (20-92)                                        | 42 (15-43)                                        |
| Days between D2/D3                    | 202 (181-266)                          | 192 (154-256)                                     | 184 (152-259)                                     |
| Days until serum draw after D3        | 28 (26-30)                             | N/A                                               | N/A                                               |
| Days between last dose/infection      | N/A                                    | 25 (3-112)                                        | 141 (36-200)                                      |
| Days until serum draw after infection | N/A                                    | 43 (25-55)                                        | 43 (28-99)                                        |

N/A, not applicable; D, dose; yrs, years; n, number.

<sup>\*</sup>, Individuals experienced SARS-CoV-2 breakthrough infections between March and May 2022, during which period the BA.2 lineage was dominant in Germany. BA.2 infection of two participants were confirmed by sequencing.

<sup>#</sup>, Omicron infection PCR-confirmed at time of recruitment to the research study. Individuals experienced SARS-CoV-2 breakthrough infections between November 2021 and January 2022, during which period the BA.1 lineage was dominant in Germany

<sup>†</sup>, No evidence of prior SARS-CoV-2 infection (based on COVID-19 symptoms/signs and SARS-CoV-2 PCR test)

<sup>‡</sup>, Participants received the primary 2-dose series of BNT162b2 vaccine as part of a governmental vaccination program and the interval between doses was not recorded

**Table S2. Individuals triple vaccinated with mRNA COVID-19 vaccine and subsequently infected with Omicron BA.1**

**(mRNA-Vax<sup>3</sup> + BA.1).**

| Participant ID | Age       | Sex        | Vaccination           | Date positive test | Omicron subtype | Dose 1-2 interval (days) | Dose 2-3 interval (days) | Positive test after last vaccination (days) | Blood draw after positive test (days) | Severity (WHO grade) |
|----------------|-----------|------------|-----------------------|--------------------|-----------------|--------------------------|--------------------------|---------------------------------------------|---------------------------------------|----------------------|
| 14             | 32        | f          | BNT <sup>3</sup>      | NOV2021            | BA.1            | 24                       | 243                      | 64                                          | 55                                    | 1-2                  |
| 15             | 32        | m          | BNT <sup>3</sup>      | NOV2021            | BA.1            | 20                       | 233                      | 66                                          | 53                                    | 1-2                  |
| 16             | 28        | m          | BNT <sup>3</sup>      | DEC2021            | n/a             | 35                       | 213                      | 10                                          | 47                                    | 1-2                  |
| 17             | 29        | f          | BNT <sup>3</sup>      | DEC2021            | BA.1            | 36                       | 189                      | 3                                           | 46                                    | 1-2                  |
| 18             | 23        | m          | BNT <sup>3</sup>      | DEC2021            | n/a             | 42                       | 159                      | 27                                          | 44                                    | 1-2                  |
| 19             | 31        | m          | BNT <sup>3</sup>      | DEC2021            | n/a             | 42                       | 166                      | 20                                          | 43                                    | 1-2                  |
| 20             | 53        | m          | BNT <sup>3</sup>      | JAN2022            | n/a             | 39                       | 194                      | 22                                          | 25                                    | 1-2                  |
| 21             | 50        | f          | BNT <sup>3</sup>      | JAN2022            | n/a             | 92                       | 169                      | 35                                          | 28                                    | 1-2                  |
| 22             | 50        | m          | BNT <sup>3</sup>      | JAN2022            | n/a             | 42                       | 169                      | 44                                          | 31                                    | 1-2                  |
| 23             | 60        | m          | BNT <sup>3</sup>      | JAN2022            | n/a             | 26                       | 236                      | 112                                         | 43                                    | 1-2                  |
| 24             | 28        | m          | MOD <sup>2</sup> /BNT | DEC2021            | n/a             | 28                       | 252                      | 22                                          | 40                                    | 1-2                  |
| 25             | 32        | m          | MOD <sup>2</sup> /BNT | DEC2021            | n/a             | 42                       | 154                      | 13                                          | 42                                    | 1-2                  |
| 26             | 50        | m          | MOD <sup>2</sup> /BNT | JAN2022            | n/a             | 28                       | 256                      | 45                                          | 31                                    | 1-2                  |
| 27             | 60        | m          | MOD <sup>3</sup>      | DEC2021            | BA.1            | 42                       | 172                      | 3                                           | 35                                    | 1-2                  |
| <b>Median</b>  | <b>32</b> | <b>N/A</b> | <b>N/A</b>            | <b>N/A</b>         | <b>N/A</b>      | <b>38</b>                | <b>192</b>               | <b>25</b>                                   | <b>43</b>                             | <b>N/A</b>           |

m, male; f, female; n/a, not available; N/A, not applicable

BNT, BioNTech/Pfizer BNT162b2; MOD, Moderna mRNA-1273; BNT<sup>3</sup>, BNT162b2 three-dose series; MOD<sup>2</sup>, mRNA-1273 two-dose series; MOD<sup>3</sup>, mRNA-1273 three-dose series

**Table S3. Individuals triple vaccinated with mRNA COVID-19 vaccine and subsequently infected with Omicron BA.2**

**(mRNA-Vax<sup>3</sup> + BA.2).**

| Participant ID | Age       | Sex        | Vaccination           | Date positive test | Omicron subtype | Dose 1-2 interval (days) | Dose 2-3 interval (days) | Positive test after last vaccination (days) | Blood draw after positive test (days) | Severity (WHO grade) |
|----------------|-----------|------------|-----------------------|--------------------|-----------------|--------------------------|--------------------------|---------------------------------------------|---------------------------------------|----------------------|
| 1              | 42        | f          | BNT <sup>3</sup>      | APR2022            | n/a             | 42                       | 158                      | 135                                         | 36                                    | 1-2                  |
| 2              | 44        | m          | BNT <sup>2</sup> /MOD | APR2022            | n/a             | 42                       | 164                      | 129                                         | 36                                    | 1-2                  |
| 3              | 28        | f          | MOD <sup>2</sup> /BNT | MAR2022            | n/a             | 42                       | 163                      | 36                                          | 99                                    | 1-2                  |
| 4              | 26        | f          | BNT <sup>3</sup>      | APR2022            | n/a             | 43                       | 152                      | 104                                         | 58                                    | 1-2                  |
| 5              | 34        | m          | BNT <sup>3</sup>      | MAY2022            | n/a             | 40                       | 154                      | 141                                         | 37                                    | 1-2                  |
| 6              | 29        | m          | BNT <sup>3</sup>      | APR2022            | n/a             | 42                       | 165                      | 89                                          | 63                                    | 1-2                  |
| 7              | 57        | f          | MOD <sup>2</sup> /BNT | APR2022            | n/a             | 15                       | 244                      | 153                                         | 46                                    | 1-2                  |
| 8              | 25        | m          | MOD/BNT <sup>2</sup>  | MAY2022            | n/a             | 28                       | 217                      | 188                                         | 34                                    | 1-2                  |
| 9              | 30        | f          | MOD <sup>2</sup> /BNT | APR2022            | n/a             | 42                       | 195                      | 129                                         | 66                                    | 1-2                  |
| 10             | 28        | f          | BNT <sup>3</sup>      | MAY2022            | n/a             | 21                       | 224                      | 64                                          | 39                                    | 1-2                  |
| 11             | 29        | f          | BNT <sup>3</sup>      | APR2022            | n/a             | 22                       | 249                      | 149                                         | 64                                    | 1-2                  |
| 12             | 53        | f          | BNT <sup>3</sup>      | MAY2022            | n/a             | 29                       | 259                      | 200                                         | 30                                    | 1-2                  |
| 13             | 72        | f          | BNT <sup>3</sup>      | MAY2022            | n/a             | 42                       | 184                      | 157                                         | 30                                    | 1-2                  |
| 46             | 25        | f          | BNT <sup>3</sup>      | MAY2022            | n/a             | 32                       | 178                      | 159                                         | 34                                    | 1-2                  |
| 47             | 28        | m          | BNT <sup>3</sup>      | MAY2022            | BA.2            | 42                       | 175                      | 199                                         | 28                                    | 1-2                  |
| 48             | 74        | m          | BNT <sup>3</sup>      | MAR2022            | n/a             | 42                       | 173                      | 122                                         | 92                                    | 1-2                  |
| 49             | 63        | f          | BNT <sup>3</sup>      | MAR2022            | n/a             | 42                       | 184                      | 109                                         | 94                                    | 1-2                  |
| 50             | 27        | f          | MOD <sup>2</sup> /BNT | APR2022            | n/a             | 35                       | 212                      | 146                                         | 71                                    | 1-2                  |
| 51             | 49        | f          | BNT <sup>3</sup>      | MAY2022            | BA.2            | 28                       | 185                      | 165                                         | 43                                    | 1-2                  |
| <b>Median</b>  | <b>30</b> | <b>N/A</b> | <b>N/A</b>            | <b>N/A</b>         | <b>N/A</b>      | <b>42</b>                | <b>184</b>               | <b>141</b>                                  | <b>43</b>                             | <b>N/A</b>           |

m, male; f, female; n/a, not available; N/A, not applicable

BNT, BioNTech/Pfizer BNT162b2; MOD, Moderna mRNA-1273; BNT<sup>2</sup>, BNT162b2 two-dose series; BNT<sup>3</sup>, BNT162b2 three-dose series; MOD<sup>2</sup>, mRNA-1273 two-dose series

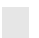

**Table S4. pVN<sub>50</sub> values of sera collected from SARS-CoV-2-naïve triple-vaccinated individuals (BNT162b2<sup>3</sup>)**

| Participant ID | pVN <sub>50</sub> |       |      |       |              |              |                   |                |                     |            |
|----------------|-------------------|-------|------|-------|--------------|--------------|-------------------|----------------|---------------------|------------|
|                | Wild-type         | Alpha | Beta | Delta | Omicron BA.1 | Omicron BA.2 | Omicron BA.2.12.1 | Omicron BA.4/5 | Omicron BA.1-BA.4/5 | SARS-CoV-1 |
| 28             | 160               | 320   | 160  | 160   | 80           | 160          | 80                | 40             | 40                  | 5          |
| 29             | 640               | 640   | 320  | 320   | 160          | 320          | 160               | 40             | 40                  | 40         |
| 30             | 5120              | 5120  | 1280 | 2560  | 1280         | 1280         | 640               | 640            | 160                 | 40         |
| 31             | 320               | 640   | 160  | 320   | 160          | 160          | 80                | 40             | 40                  | 20         |
| 32             | 640               | 640   | 80   | 640   | 320          | 160          | 40                | 40             | 20                  | 20         |
| 33             | 320               | 640   | 160  | 320   | 160          | 160          | 80                | 40             | 20                  | 10         |
| 34             | 320               | 640   | 320  | 320   | 160          | 160          | 80                | 80             | 40                  | 10         |
| 35             | 320               | 640   | 320  | 320   | 160          | 160          | 160               | 80             | 40                  | 20         |
| 36             | 160               | 320   | 80   | 160   | 40           | 80           | 40                | 40             | 10                  | 20         |
| 37             | 320               | 1280  | 160  | 320   | 160          | 60           | 160               | 80             | 40                  | 20         |
| 38             | 1280              | 5120  | 640  | 1280  | 640          | 640          | 640               | 320            | 160                 | 80         |
| 39             | 40                | 40    | 20   | 20    | 5            | 40           | 10                | 5              | 5                   | 5          |
| 40             | 320               | 640   | 320  | 320   | 80           | 160          | 80                | 40             | 20                  | 20         |
| 41             | 160               | 320   | 160  | 320   | 80           | 160          | 80                | 40             | 20                  | 20         |
| 42             | 320               | 640   | 320  | 320   | 320          | 320          | 160               | 160            | 40                  | 20         |
| 43             | 640               | 640   | 320  | 320   | 160          | 320          | 80                | 80             | 40                  | 40         |
| 44             | 2560              | 5120  | 640  | 1280  | 640          | 640          | 320               | 320            | 160                 | 80         |
| 45             | 320               | 640   | 160  | 640   | 160          | 320          | 80                | 80             | 80                  | 20         |

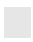

**Table S5. pVN<sub>50</sub> values of sera collected from individuals with Omicron BA.1 breakthrough infection (mRNA-Vax<sup>3</sup> + BA.1)**

| Participant ID | pVN <sub>50</sub> |       |      |       |              |              |                   |                |                     |            |
|----------------|-------------------|-------|------|-------|--------------|--------------|-------------------|----------------|---------------------|------------|
|                | Wild-type         | Alpha | Beta | Delta | Omicron BA.1 | Omicron BA.2 | Omicron BA.2.12.1 | Omicron BA.4/5 | Omicron BA.1-BA.4/5 | SARS-CoV-1 |
| 14             | 1920              | 3840  | 1920 | 1920  | 1920         | 960          | 640               | 320            | 80                  | 120        |
| 15             | 960               | 1920  | 960  | 480   | 480          | 480          | 640               | 160            | 320                 | 120        |
| 16             | 3840              | 3840  | 3840 | 3840  | 1920         | 1920         | 1280              | 640            | 640                 | 960        |
| 17             | 960               | 1920  | 960  | 960   | 960          | 960          | 640               | 160            | 160                 | 120        |
| 18             | 480               | 1920  | 960  | 480   | 480          | 480          | 640               | 40             | 40                  | 20         |
| 19             | 1920              | 1920  | 960  | 960   | 960          | 1920         | 640               | 320            | 320                 | 40         |
| 20             | 960               | 1920  | 960  | 960   | 1920         | 480          | 320               | 80             | 160                 | 80         |
| 21             | 960               | 1920  | 480  | 960   | 480          | 480          | 320               | 80             | 80                  | 5          |
| 22             | 480               | 960   | 480  | 480   | 480          | 480          | 320               | 80             | 40                  | 60         |
| 23             | 1920              | 3840  | 3840 | 3840  | 3840         | 1920         | 1280              | 2560           | 1280                | 120        |
| 24             | 3840              | 15360 | 7680 | 7680  | 3840         | 3840         | 2560              | 2560           | 1280                | 120        |
| 25             | 7680              | 15360 | 7680 | 3840  | 15360        | 3840         | 2560              | 1280           | 640                 | 480        |
| 26             | 480               | 240   | 60   | 240   | 60           | 120          | 40                | 40             | 10                  | 30         |
| 27             | 1920              | 1920  | 960  | 1920  | 960          | 960          | 640               | 640            | 320                 | 60         |



**Table S6. pVN<sub>50</sub> values of sera collected from individuals with Omicron BA.2 breakthrough infection (mRNA-Vax<sup>3</sup> + BA.2)**

| Participant ID | pVN <sub>50</sub> |       |      |       |              |              |                   |                |                     |            |
|----------------|-------------------|-------|------|-------|--------------|--------------|-------------------|----------------|---------------------|------------|
|                | Wild-type         | Alpha | Beta | Delta | Omicron BA.1 | Omicron BA.2 | Omicron BA.2.12.1 | Omicron BA.4/5 | Omicron BA.1-BA.4/5 | SARS-CoV-1 |
| 1              | 480               | 1920  | 960  | 480   | 240          | 480          | 160               | 120            | 80                  | 5          |
| 2              | 3840              | 7680  | 3840 | 3840  | 3840         | 3840         | 2560              | 960            | 160                 | 40         |
| 3              | 480               | 960   | 240  | 240   | 240          | 240          | 240               | 120            | 40                  | 10         |
| 4              | 240               | 480   | 120  | 120   | 120          | 240          | 120               | 120            | 10                  | 5          |
| 5              | 1920              | 1920  | 480  | 960   | 240          | 480          | 480               | 240            | 80                  | 20         |
| 6              | 480               | 480   | 240  | 480   | 240          | 480          | 240               | 240            | 80                  | 5          |
| 7              | 960               | 960   | 480  | 960   | 960          | 960          | 480               | 480            | 160                 | 5          |
| 8              | 960               | 1920  | 960  | 1920  | 960          | 960          | 960               | 480            | 320                 | 20         |
| 9              | 1920              | 3840  | 960  | 1920  | 960          | 1920         | 1920              | 480            | 160                 | 20         |
| 10             | 960               | 960   | 240  | 960   | 240          | 480          | 240               | 120            | 160                 | 10         |
| 11             | 960               | 960   | 480  | 960   | 240          | 480          | 480               | 480            | 80                  | 10         |
| 12             | 1920              | 1920  | 960  | 1920  | 240          | 1920         | 1920              | 1920           | 640                 | 5          |
| 13             | 960               | 1920  | 960  | 960   | 960          | 960          | 480               | 1920           | 320                 | 20         |
| 46             | 240               | 240   | 240  | 120   | 120          | 240          | 240               | 120            | 40                  | 40         |
| 47             | 960               | 960   | 960  | 960   | 960          | 960          | 960               | 960            | 320                 | 80         |
| 48             | 3840              | 7680  | 3840 | 1920  | 1920         | 3840         | 960               | 480            | 320                 | 640        |
| 49             | 960               | 960   | 240  | 480   | 240          | 480          | 480               | 240            | 20                  | 20         |
| 50             | 960               | 1920  | 960  | 480   | 960          | 960          | 960               | 960            | 160                 | 160        |
| 51             | 3840              | 3840  | 1920 | 1920  | 1920         | 1920         | 960               | 480            | 320                 | 160        |



**Table S7. VN<sub>50</sub> values of sera collected from SARS-CoV-2-naïve triple-vaccinated individuals (BNT162b<sup>3</sup>)**

| Participant ID | VN <sub>50</sub> |       |      |       |              |              |              |
|----------------|------------------|-------|------|-------|--------------|--------------|--------------|
|                | Wild-type        | Alpha | Beta | Delta | Omicron BA.1 | Omicron BA.2 | Omicron BA.4 |
| 28             | 226              | 320   | 80   | 226   | 40           | 40           | 28           |
| 29             | 640              | 320   | 226  | 226   | 160          | 80           | 28           |
| 30             | 3620             | 2560  | 1280 | 1810  | 453          | 905          | 226          |
| 31             | 226              | 113   | 226  | 160   | 40           | 80           | 28           |
| 32             | 226              | 453   | 80   | 160   | 57           | 40           | 20           |
| 33             | 640              | 453   | 113  | 226   | 80           | 57           | 40           |
| 34             | 453              | 226   | 226  | 453   | 80           | 80           | 28           |
| 35             | 640              | 320   | 226  | 226   | 160          | 113          | 40           |
| 36             | 160              | 160   | 80   | 113   | 28           | 40           | 20           |
| 37             | 640              | 453   | 80   | 320   | 80           | 113          | 40           |
| 38             | 3620             | 1280  | 905  | 1280  | 453          | 453          | 160          |
| 38             | 28               | 20    | 10   | 10    | 5            | 10           | 5            |
| 39             | 453              | 320   | 113  | 226   | 40           | 80           | 20           |
| 40             | 226              | 320   | 113  | 226   | 57           | 57           | 28           |
| 41             | 905              | 226   | 160  | 453   | 160          | 113          | 40           |
| 42             | 1280             | 226   | 160  | 226   | 113          | 113          | 40           |
| 43             | 3620             | 1810  | 905  | 1810  | 1280         | 453          | 160          |
| 44             | 905              | 453   | 226  | 320   | 80           | 113          | 40           |
| 45             | 226              | 320   | 80   | 226   | 40           | 40           | 28           |

**Table S8. VN<sub>50</sub> values of sera collected from individuals with Omicron BA.1 breakthrough infection (mRNA-Vax<sup>3</sup> + BA.1)**

| Participant ID | VN <sub>50</sub> |       |      |       |              |              |              |
|----------------|------------------|-------|------|-------|--------------|--------------|--------------|
|                | Wild-type        | Alpha | Beta | Delta | Omicron BA.1 | Omicron BA.2 | Omicron BA.4 |
| 14             | 453              | 1280  | 1280 | 1280  | 640          | 905          | 226          |
| 15             | 453              | 640   | 640  | 640   | 453          | 453          | 80           |
| 16             | 1810             | 3620  | 1810 | 2560  | 1810         | 1280         | 453          |
| 17             | 453              | 1280  | 905  | 1280  | 453          | 640          | 160          |
| 18             | 453              | 640   | 640  | 640   | 640          | 320          | 57           |
| 19             | 640              | 1280  | 640  | 905   | 640          | 905          | 160          |
| 20             | 320              | 640   | 640  | 453   | 453          | 640          | 160          |
| 21             | 905              | 905   | 320  | 1280  | 320          | 453          | 80           |
| 22             | 320              | 453   | 453  | 640   | 640          | 453          | 80           |
| 23             | 1280             | 2560  | 1810 | 2560  | 1280         | 2560         | 640          |
| 24             | 5120             | 3620  | 3620 | 3620  | 1280         | 3620         | 640          |
| 25             | 5120             | 5120  | 5120 | 5120  | 5120         | 3620         | 453          |
| 26             | 160              | 113   | 40   | 160   | 40           | 113          | 7            |
| 27             | 1280             | 1280  | 1280 | 2560  | 905          | 905          | 320          |

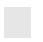

**Table S9. VN<sub>50</sub> values of sera collected from individuals with Omicron BA.2 breakthrough infection (mRNA-Vax<sup>3</sup> + BA.2)**

| Participant ID | VN <sub>50</sub> |       |      |       |              |              |              |
|----------------|------------------|-------|------|-------|--------------|--------------|--------------|
|                | Wild-type        | Alpha | Beta | Delta | Omicron BA.1 | Omicron BA.2 | Omicron BA.4 |
| 1              | 320              | 1810  | 320  | 453   | 226          | 320          | 113          |
| 2              | 3620             | 5120  | 3620 | 5120  | 3620         | 3620         | 905          |
| 3              | 320              | 905   | 226  | 226   | 160          | 226          | 113          |
| 4              | 160              | 226   | 113  | 113   | 80           | 226          | 40           |
| 5              | 905              | 2560  | 320  | 905   | 226          | 640          | 226          |
| 6              | 160              | 453   | 160  | 453   | 226          | 160          | 113          |
| 7              | 640              | 1810  | 320  | 640   | 640          | 640          | 226          |
| 8              | 640              | 1810  | 1810 | 1280  | 905          | 453          | 226          |
| 9              | 905              | 1810  | 2560 | 2560  | 640          | 1280         | 320          |
| 10             | 453              | 1810  | 320  | 453   | 226          | 320          | 160          |
| 11             | 320              | 1280  | 453  | 905   | 160          | 640          | 226          |
| 12             | 1280             | 2560  | 640  | 2560  | 320          | 1280         | 640          |
| 13             | 453              | 2560  | 1280 | 905   | 453          | 640          | 320          |
| 46             | 453              | 1280  | 453  | 905   | 113          | 640          | 226          |
| 47             | 453              | 2560  | 905  | 905   | 1280         | 640          | 226          |
| 48             | 2560             | 5120  | 2560 | 3620  | 640          | 1810         | 640          |
| 49             | 226              | 1810  | 113  | 320   | 226          | 453          | 113          |
| 50             | 640              | 1810  | 905  | 905   | 226          | 453          | 226          |
| 51             | 1810             | 2560  | 1810 | 3620  | 640          | 1810         | 320          |

**Table S10. Vaccinated individuals analyzed for neutralizing antibody responses after depletion of RBD-/NTD-binding antibodies.**

| <b>Characteristic</b>                 | <b>mRNA-Vax<sup>3</sup><br/>+ BA.2<br/>(n=6)</b> | <b>mRNA-Vax<sup>3</sup><br/>+ BA.1<br/>(n=6)</b> | <b>BNT162b2<sup>3</sup><br/>(n=6)</b> |
|---------------------------------------|--------------------------------------------------|--------------------------------------------------|---------------------------------------|
| Sex, n (%)                            |                                                  |                                                  |                                       |
| Male                                  | 1 (17)                                           | 4 (67)                                           | 4 (67)                                |
| Female                                | 5 (83)                                           | 2 (33)                                           | 2 (33)                                |
| Age, median (range)                   | 41.5 (25-72)                                     | 32 (29-53)                                       | 36 (23-49)                            |
| Age group at vaccination, n (%)       |                                                  |                                                  |                                       |
| 18-55 yrs                             | 4 (67)                                           | 6 (100)                                          | 6 (100)                               |
| 56-85 yrs                             | 2 (33)                                           | 0 (0)                                            | 0 (0)                                 |
| SARS-CoV-2 status, n (%)              |                                                  |                                                  |                                       |
| Positive                              | 6 (100)*                                         | 6 (100)#                                         | 0 (0)                                 |
| Negative                              | 0 (0)                                            | 0 (0)                                            | 6 (100)†                              |
| Unknown                               | 0 (0)                                            | 0 (0)                                            | 0 (0)                                 |
| Interval, median (range)              |                                                  |                                                  |                                       |
| Days between D1/D2                    | 28.5 (15-42)                                     | 39 (20-92)                                       | ‡                                     |
| Days between D2/D3                    | 230.5 (184-259)                                  | 189 (154-233)                                    | 219 (181-266)                         |
| Days until serum draw after D3        | N/A                                              | N/A                                              | 27.5 (26-30)                          |
| Days between last dose/infection      | 155 (129-200)                                    | 20 (3-66)                                        | N/A                                   |
| Days until serum draw after infection | 40 (30-66)                                       | 43 (25-53)                                       | N/A                                   |

N/A: not applicable; D, Dose; Yrs, Years; n, Number.

\*, Individuals experienced SARS-CoV-2 breakthrough infections between March and May 2022, during which period the BA.2 lineage was dominant in Germany

#, Omicron infection PCR-confirmed at time of recruitment to the research study. Individuals experienced SARS-CoV-2 breakthrough infections between November 2021 and January 2022, during which period the BA.1 lineage was dominant in Germany

†, No evidence of prior SARS-CoV-2 infection (based on COVID-19 symptoms/signs and SARS-CoV-2 PCR test)

‡, Participants received the primary 2-dose series of BNT162b2 vaccine as part of a governmental vaccination program and the interval between doses was not recorded.

**Table S11. pVN<sub>50</sub> values of sera depleted of NTD or RBD-binding antibodies**

| Participant ID | Cohort                      | pVN <sub>50</sub> |      |     |              |      |     |              |      |      |                |     |      |
|----------------|-----------------------------|-------------------|------|-----|--------------|------|-----|--------------|------|------|----------------|-----|------|
|                |                             | Wild-type         |      |     | Omicron BA.1 |      |     | Omicron BA.2 |      |      | Omicron BA.4/5 |     |      |
|                |                             | Mock              | NTD  | RBD | Mock         | NTD  | RBD | Mock         | NTD  | RBD  | Mock           | NTD | RBD  |
| 7              | mRNA-Vax <sup>3</sup> +BA.2 | 1179              | 1021 | 200 | 996          | 1143 | 10  | 880          | 668  | 219  | 494            | 252 | 193  |
| 8              | mRNA-Vax <sup>3</sup> +BA.2 | 2039              | 1187 | 158 | 1276         | 1491 | 10  | 981          | 730  | 162  | 1148           | 525 | 123  |
| 9              | mRNA-Vax <sup>3</sup> +BA.2 | 2226              | 1607 | 673 | 1224         | 1276 | 10  | 1217         | 738  | 460  | 1139           | 420 | 535  |
| 11             | mRNA-Vax <sup>3</sup> +BA.2 | 1435              | 939  | 251 | 650          | 641  | 10  | 537          | 346  | 169  | 538            | 273 | 97   |
| 12             | mRNA-Vax <sup>3</sup> +BA.2 | 3562              | 2287 | 834 | 674          | 479  | 10  | 5562         | 805  | 1129 | 1797           | 626 | 1043 |
| 13             | mRNA-Vax <sup>3</sup> +BA.2 | 1463              | 2956 | 98  | 1401         | 1219 | 10  | 1403         | 732  | 247  | 821            | 634 | 118  |
| 15             | mRNA-Vax <sup>3</sup> +BA.1 | 1037              | 953  | 103 | 601          | 623  | 10  | 359          | 354  | 10   | 239            | 232 | 10   |
| 17             | mRNA-Vax <sup>3</sup> +BA.1 | 1401              | 1681 | 61  | 1525         | 1379 | 10  | 973          | 740  | 25   | 492            | 430 | 45   |
| 19             | mRNA-Vax <sup>3</sup> +BA.1 | 1992              | 1589 | 235 | 1754         | 1363 | 54  | 990          | 923  | 10   | 573            | 438 | 10   |
| 20             | mRNA-Vax <sup>3</sup> +BA.1 | 842               | 766  | 127 | 789          | 836  | 10  | 825          | 557  | 10   | 241            | 319 | 10   |
| 21             | mRNA-Vax <sup>3</sup> +BA.1 | 1404              | 1751 | 77  | 697          | 546  | 10  | 388          | 556  | 10   | 277            | 254 | 10   |
| 25             | mRNA-Vax <sup>3</sup> +BA.1 | 1870              | 1224 | 219 | 1439         | 1613 | 46  | 849          | 1216 | 27   | 886            | 612 | 10   |
| 30             | BNT162b2 <sup>3</sup>       | 3818              | 2279 | 497 | 746          | 923  | 10  | 1349         | 644  | 463  | 620            | 238 | 278  |
| 32             | BNT162b2 <sup>3</sup>       | 521               | 537  | 160 | 143          | 173  | 10  | 98           | 644  | 10   | 59             | 238 | 10   |
| 38             | BNT162b2 <sup>3</sup>       | 2085              | 2332 | 348 | 1014         | 1147 | 39  | 844          | 931  | 38   | 364            | 276 | 56   |
| 43             | BNT162b2 <sup>3</sup>       | 631               | 671  | 281 | 237          | 265  | 10  | 187          | 164  | 40   | 108            | 101 | 36   |
| 44             | BNT162b2 <sup>3</sup>       | 1985              | 2071 | 463 | 745          | 591  | 10  | 525          | 648  | 61   | 247            | 222 | 47   |
| 45             | BNT162b2 <sup>3</sup>       | 631               | 487  | 133 | 191          | 167  | 10  | 131          | 130  | 10   | 119            | 97  | 10   |
